# Supplementary material
Source: publisher figshare collection journal article supplement (https://acs.figshare.com/ndownloader/files/4948798)
Supplement: Supplementary file 1 [file 4948798]

# **Supplementary Information: A Critical Comparison of Biomembrane Force Fields: Structure and Dynamics of Model DMPC, POPC, and POPE Bilayers**

Kristyna Pluhackova,<sup>\*,†</sup> Sonja A. Kirsch,<sup>†</sup> Jing Han,<sup>†</sup> Liping Sun,<sup>†</sup> Zhenyan  
Jiang,<sup>†</sup> Tobias Unruh,<sup>‡</sup> and Rainer A. Böckmann<sup>\*,†</sup>

<sup>†</sup>*Computational Biology, Department of Biology, Friedrich-Alexander-University of  
Erlangen-Nürnberg, Staudtstr. 5, 91058 Erlangen*

<sup>‡</sup>*Lehrstuhl für Kristallografie und Strukturphysik, Department Physik,  
Friedrich-Alexander-University of Erlangen-Nürnberg, Staudtstr. 3, 91058 Erlangen*

E-mail: kristyna.pluhackova@fau.de; rainer.boeckmann@fau.de

**Table S1:** Volumes of individual water molecule (in nm<sup>3</sup>) simulated using force field specific parameter file (mdp files in GROMACS) calculated out of 4 ns simulations containing 14 572 water molecules.

| Force field | water model         | 320 K   | 300 K   | 308 K   |
|-------------|---------------------|---------|---------|---------|
| CHARMM36    | TIPS3P <sup>1</sup> | 0.03020 | 0.02966 | 0.02988 |
| Slipids     | TIP3P <sup>2</sup>  | 0.03097 | 0.03038 | 0.03061 |
| Lipid14     | TIP3P <sup>2</sup>  | 0.03097 | 0.03039 | 0.03061 |
| GROMOS54a7  | SPC <sup>3</sup>    | 0.03125 | 0.03074 | 0.03093 |

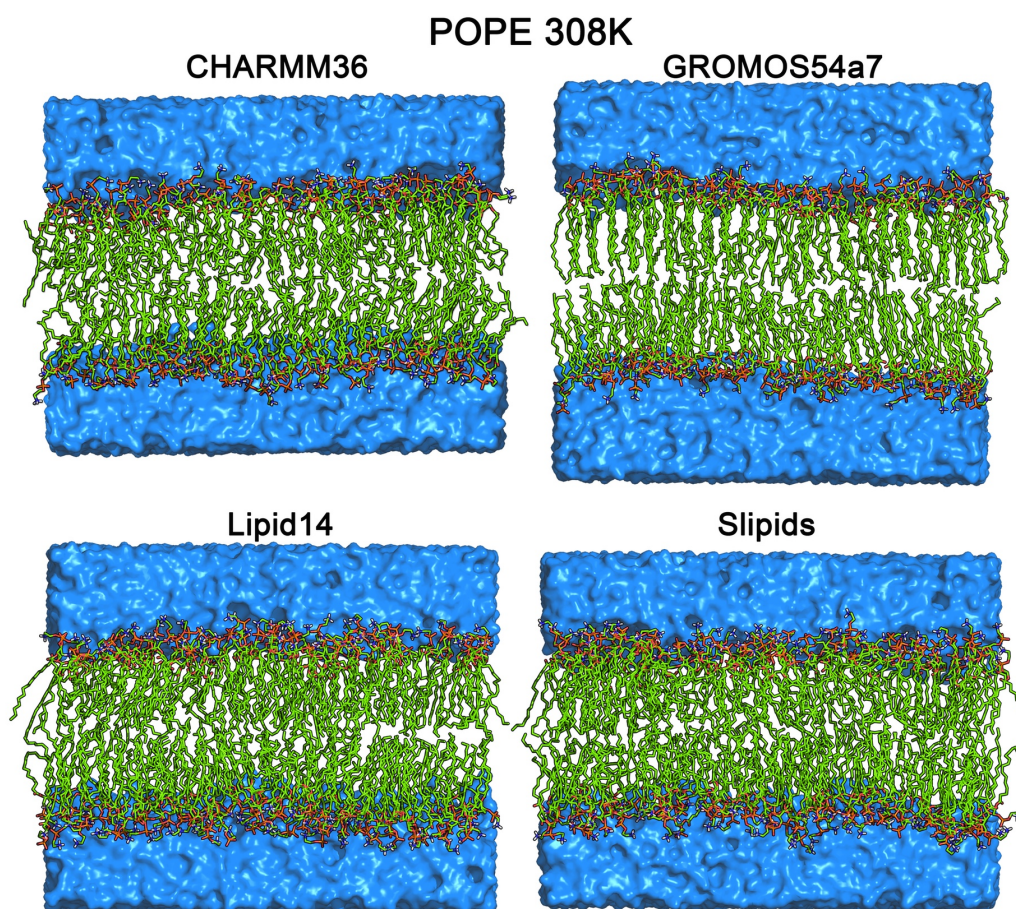

Figure S1: POPE simulation systems after 200 ns simulation time at 300 K. Only GROMOS54a7 which is partially in a gel phase doesn't exhibit a proper fluid phase. Hydrogen atoms were omitted for clarity. Water is shown as blue surface, DMPC as atom-color-coded sticks (carbon in green, oxygen in red, nitrogen in blue, and phosphorus in orange).

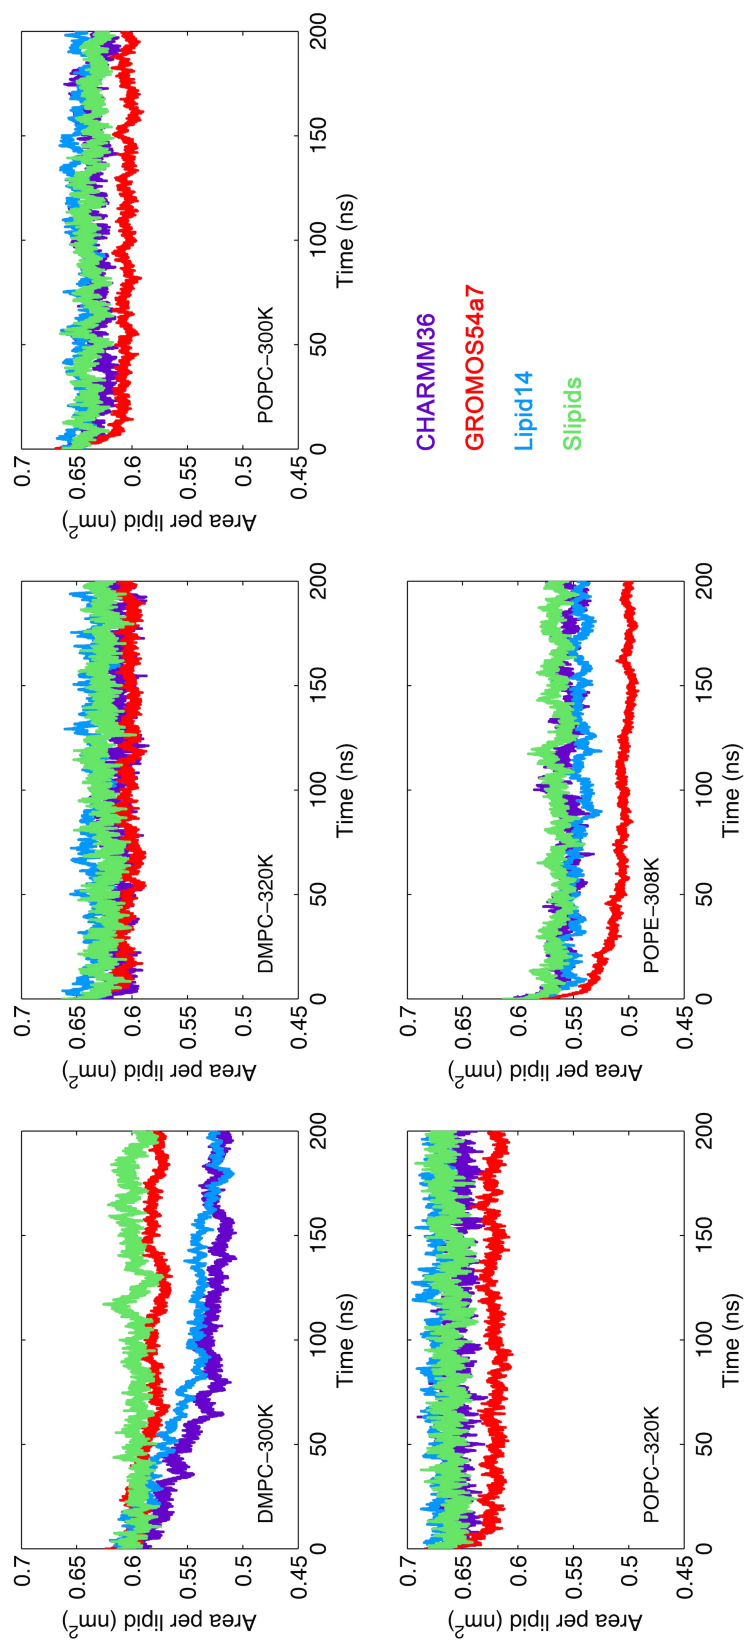

Figure S2: Evolution of the area per lipid over time.





|            | T (K) | COM bilayer removal<br>Atoms                         |                                                      | COM monolayer removal<br>Atoms                       |                                                      |                                                      |                                                      | COM monolayer removal<br>COM lipid                   |  | FF literature     | Experimental                           |
|------------|-------|------------------------------------------------------|------------------------------------------------------|------------------------------------------------------|------------------------------------------------------|------------------------------------------------------|------------------------------------------------------|------------------------------------------------------|--|-------------------|----------------------------------------|
|            |       | D (10 <sup>-8</sup> cm <sup>2</sup> /s) <sup>A</sup> | D (10 <sup>-8</sup> cm <sup>2</sup> /s) <sup>B</sup> | D (10 <sup>-8</sup> cm <sup>2</sup> /s) <sup>C</sup> | D (10 <sup>-8</sup> cm <sup>2</sup> /s) <sup>D</sup> | D (10 <sup>-8</sup> cm <sup>2</sup> /s) <sup>E</sup> | D (10 <sup>-8</sup> cm <sup>2</sup> /s) <sup>F</sup> | D (10 <sup>-8</sup> cm <sup>2</sup> /s) <sup>G</sup> |  |                   |                                        |
| GROMOS54a7 |       |                                                      |                                                      |                                                      |                                                      |                                                      |                                                      |                                                      |  |                   |                                        |
| DMPC       | 300   | 3.43 (± 0.14)                                        | 3.21 (± 0.08)                                        | 0.77 (± 0.08)                                        | 0.72 (± 0.04)                                        | 0.49                                                 | 1.12 (± 0.05)                                        | 0.36 (± 0.02)                                        |  |                   | 5 (300K); (a)<br>10.01 (300K); (b)     |
|            | 320   | 6.28 (± 0.37)                                        | 5.10 (± 0.14)                                        | 1.90 (± 0.15)                                        | 1.80 (± 0.12)                                        | 1.20                                                 | 2.28 (± 0.10)                                        | 1.25 (± 0.01)                                        |  | DPPC: 2.6 (323 K) | 12 (320K); (a)<br>19.448 (320K); (b)   |
| DMPC-PME   | 320   | -                                                    | -                                                    | -                                                    | -                                                    | -                                                    | 3.16 (± 0.12)                                        | 2.18 (± 0.23)                                        |  |                   |                                        |
| POPC       | 300   | 5.97 (± 0.33)                                        | 4.62 (± 0.10)                                        | 1.04 (± 0.03)                                        | 1.00 (± 0.07)                                        | 0.67                                                 | 1.49 (± 0.06)                                        | 0.5 (± 0.04)                                         |  | -                 | 5.52 (300K); (b)<br>4.0 (303K); (c)    |
|            | 320   | 7.72 (± 0.20)                                        | 6.64 (± 0.17)                                        | 1.86 (± 0.17)                                        | 1.95 (± 0.02)                                        | 1.82                                                 | 2.67 (± 0.13)                                        | 1.23 (± 0.01)                                        |  | -                 | 18.068 (320K); (b)<br>7.0 (323 K); (c) |
| POPE       | 308   | 2.56 (± 0.28)                                        | 1.60 (± 0.07)                                        | 0.37 (± 0.04)                                        | 0.35 (± 0.008)                                       | 0.24                                                 | 0.51 (± 0.04)                                        | 0.15 (± 0.0002)                                      |  | -                 | 5.2 (307 K); (d)                       |

| Lipid14 | T (K) | COM bilayer removal                   |                                       | COM monolayer removal                 |                                       |                                       |                                       | COM monolayer removal                 |             | FF literature                          | Experimental |
|---------|-------|---------------------------------------|---------------------------------------|---------------------------------------|---------------------------------------|---------------------------------------|---------------------------------------|---------------------------------------|-------------|----------------------------------------|--------------|
|         |       | Atoms                                 |                                       | Atoms                                 |                                       | COM lipid                             |                                       |                                       |             |                                        |              |
|         |       | $D (10^{-8} \text{ cm}^2/\text{s})^A$ | $D (10^{-8} \text{ cm}^2/\text{s})^B$ | $D (10^{-8} \text{ cm}^2/\text{s})^C$ | $D (10^{-8} \text{ cm}^2/\text{s})^D$ | $D (10^{-8} \text{ cm}^2/\text{s})^E$ | $D (10^{-8} \text{ cm}^2/\text{s})^F$ | $D (10^{-8} \text{ cm}^2/\text{s})^G$ |             |                                        |              |
| DMPC    | 300   | 4.63 (± 0.21)                         | 4.48 (± 0.18)                         | 2.10 (± 0.32)                         | 1.89 (± 0.40)                         | 1.34                                  | 2.04 (± 0.11)                         | 1.4 (± 0.35)                          | 5.05 (303K) | 5 (300K); (a)<br>10.01 (300K); (b)     |              |
|         | 320   | 19.13 (± 0.49)                        | 18.34 (± 0.47)                        | 11.67 (± 1.08)                        | 10.80 (± 0.50)                        | 8.03                                  | 12.34 (± 0.45)                        | 10.41 (± 0.49)                        | -           | 12 (320K); (a)<br>19.448 (320K); (b)   |              |
| POPC    | 300   | 11.66 (± 0.18)                        | 11.31 (± 0.22)                        | 5.04 (± 0.27)                         | 4.76 (± 0.005)                        | 3.54                                  | 5.51 (± 0.19)                         | 3.92 (± 0.07)                         | 5.74 (303K) | 5.52 (300K); (b)<br>4.0 (303K); (c)    |              |
|         | 320   | 20.28 (± 0.46)                        | 19.47 (± 0.46)                        | 11.28 (± 0.75)                        | 11.50 (± 0.70)                        | 10.45                                 | 12.04 (± 0.44)                        | 10.95 (± 0.65)                        | -           | 18.068 (320K); (b)<br>7.0 (323 K); (c) |              |
| POPE    | 308   | 9.39 (± 0.41)                         | 8.17 (± 0.25)                         | 3.30 (± 0.31)                         | 3.71 (± 0.71)                         | 3.76                                  | 4.3 (± 0.22)                          | 3.13 (± 0.73)                         | 4.67 (310K) | 5.2 (307 K); (d)                       |              |

|         |       | COM bilayer removal                   |                                       | COM monolayer removal                 |                                       |                                       | COM monolayer removal                 |                                       |                    |                                        |
|---------|-------|---------------------------------------|---------------------------------------|---------------------------------------|---------------------------------------|---------------------------------------|---------------------------------------|---------------------------------------|--------------------|----------------------------------------|
|         |       | Atoms                                 |                                       | Atoms                                 |                                       |                                       | COM lipid                             |                                       |                    |                                        |
| Slipids | T (K) | $D (10^{-8} \text{ cm}^2/\text{s})^A$ | $D (10^{-8} \text{ cm}^2/\text{s})^B$ | $D (10^{-8} \text{ cm}^2/\text{s})^C$ | $D (10^{-8} \text{ cm}^2/\text{s})^D$ | $D (10^{-8} \text{ cm}^2/\text{s})^E$ | $D (10^{-8} \text{ cm}^2/\text{s})^F$ | $D (10^{-8} \text{ cm}^2/\text{s})^G$ | FF literature      | Experimental                           |
| DMPC    | 300   | 10.8 (± 0.4)                          | 10.04 (± 0.27)                        | 4.72 (± 0.46)                         | 4.75 (± 0.07)                         | 4.65                                  | 5.37 (± 0.23)                         | 4.16 (± 0.10)                         | 5.22 ± 0.49 (303K) | 5 (300K); (a)<br>10.01 (300K); (b)     |
|         | 320   | 20.64 (± 0.44)                        | 19.75 (± 0.44)                        | 12.48 (± 1.30)                        | 13.25 (± 1.95)                        | 15.50                                 | 13.94 (± 0.43)                        | 12.9 (±2.00)                          | 11.8 ±2.10 (323K)  | 12 (320K); (a)<br>19.448 (320K); (b)   |
| POPC    | 300   | 12.44 (± 0.31)                        | 11.92 (± 0.23)                        | 5.26 (± 0.46)                         | 5.08 (± 0.18)                         | 4.65                                  | 5.96 (± 0.20)                         | 4.26 (± 0.22)                         | 4.71 ± 0.2 (303K)  | 5.52 (300K); (b)<br>4.0 (303K); (c)    |
|         | 320   | 20.38 (± 0.67)                        | 19.58 (± 0.54)                        | 11.63 (± 0.66)                        | 11.30 (± 0.2)                         | 11.85                                 | 12.51 (± 0.51)                        | 10.85 (± 0.25)                        | 15.9 ± 0.8 (323K)  | 18.068 (320K); (b)<br>7.0 (323 K); (c) |
| POPE    | 308   | 10.41 (± 0.37)                        | 8.55 (± 0.27)                         | 4.36 (± 0.51)                         | 4.48 (± 0.38)                         | 5.09                                  | 4.52 (± 0.26)                         | 3.86 (± 0.35)                         | 2.12 ± 0.4 (303K)  | 5.2 (307 K); (d)                       |

**Table S2: Detailed results of lipid chain protrusion analysis. Analysis performed on 60 – 200 ns of simulations. Protrusions recorded at a single frame (10 ps) were excluded from the analysis. The value in paranthesis by median time denotes the interquartile range. Protrusion efficiency is a product of protrusion probability and the median time of a protrusion event.**

| Simulated System  | layer | number of protrusions | probability per lipid [ $1/\mu\text{s}$ ] | median time (IQR) [ns] | maximal time [ns] | protrusion efficiency |
|-------------------|-------|-----------------------|-------------------------------------------|------------------------|-------------------|-----------------------|
| <b>CHARMM36</b>   |       |                       |                                           |                        |                   |                       |
| DMPC              | lower | 33                    | 1.228                                     | 0.38 (1.68)            | 8.09              | 0.467                 |
| 300K              | upper | 35                    | 1.302                                     | 0.46 (3.23)            | 12.11             | 0.599                 |
| DMPC              | lower | 77                    | 2.865                                     | 0.17 (0.50)            | 2.81              | 0.487                 |
| 320K              | upper | 74                    | 2.753                                     | 0.12 (0.37)            | 3.62              | 0.317                 |
| POPC              | lower | 44                    | 1.637                                     | 0.41 (1.19)            | 3.48              | 0.663                 |
| 300K              | upper | 46                    | 1.711                                     | 0.34 (0.83)            | 2.94              | 0.582                 |
| POPC              | lower | 72                    | 2.679                                     | 0.18 (0.43)            | 2.43              | 0.482                 |
| 320K              | upper | 86                    | 3.199                                     | 0.20 (0.41)            | 1.76              | 0.624                 |
| POPE              | lower | 7                     | 0.260                                     | 0.04 (0.99)            | 2.53              | 0.010                 |
| 308K              | upper | 12                    | 0.446                                     | 0.13 (0.32)            | 2.61              | 0.056                 |
| <b>Slipids</b>    |       |                       |                                           |                        |                   |                       |
| DMPC              | lower | 65                    | 2.418                                     | 0.27 (0.69)            | 4.86              | 0.653                 |
| 300K              | upper | 59                    | 2.195                                     | 0.29 (0.90)            | 5.62              | 0.637                 |
| DMPC              | lower | 146                   | 5.432                                     | 0.24 (0.55)            | 3.14              | 1.304                 |
| 320K              | upper | 121                   | 4.501                                     | 0.24 (0.55)            | 2.28              | 1.080                 |
| POPC              | lower | 66                    | 2.455                                     | 0.33 (0.83)            | 4.95              | 0.798                 |
| 300K              | upper | 71                    | 2.641                                     | 0.25 (1.11)            | 3.52              | 0.660                 |
| POPC              | lower | 162                   | 6.027                                     | 0.17 (0.60)            | 3.32              | 0.994                 |
| 320K              | upper | 152                   | 5.655                                     | 0.13 (0.37)            | 2.3               | 0.707                 |
| POPE              | lower | 30                    | 1.116                                     | 0.34 (0.82)            | 4.08              | 0.379                 |
| 308K              | upper | 33                    | 1.228                                     | 0.24 (0.75)            | 2.84              | 0.295                 |
| <b>Lipid14</b>    |       |                       |                                           |                        |                   |                       |
| DMPC              | lower | 326                   | 12.128                                    | 0.40 (1.25)            | 20.85             | 4.791                 |
| 300K              | upper | 209                   | 7.775                                     | 0.57 (1.30)            | 22.43             | 4.432                 |
| DMPC              | lower | 362                   | 13.467                                    | 0.16 (0.51)            | 3.09              | 2.155                 |
| 320K              | upper | 367                   | 13.653                                    | 0.18 (0.55)            | 3.83              | 2.458                 |
| POPC              | lower | 249                   | 9.263                                     | 0.24 (0.63)            | 4.21              | 2.223                 |
| 300K              | upper | 267                   | 9.933                                     | 0.26 (0.70)            | 4.47              | 2.583                 |
| POPC              | lower | 426                   | 15.848                                    | 0.17 (0.45)            | 4.55              | 2.694                 |
| 320K              | upper | 424                   | 15.774                                    | 0.19 (0.49)            | 3.58              | 2.997                 |
| POPE              | lower | 217                   | 8.073                                     | 0.25 (0.78)            | 5.32              | 2.018                 |
| 308K              | upper | 186                   | 6.920                                     | 0.33 (0.72)            | 4.14              | 2.249                 |
| <b>GROMOS54a7</b> |       |                       |                                           |                        |                   |                       |
| DMPC              | lower | 25                    | 0.930                                     | 0.89 (1.74)            | 5.04              | 0.487                 |
| 300K              | upper | 30                    | 1.116                                     | 0.65 (1.51)            | 14.82             | 0.487                 |
| DMPC              | lower | 45                    | 1.674                                     | 0.34 (1.28)            | 5.75              | 0.487                 |
| 320K              | upper | 58                    | 2.158                                     | 0.47 (1.53)            | 4.68              | 0.487                 |
| POPC              | lower | 22                    | 0.818                                     | 0.50 (1.79)            | 6.48              | 0.487                 |
| 300K              | upper | 28                    | 1.042                                     | 0.68 (1.70)            | 3.96              | 0.487                 |
| POPC              | lower | 47                    | 1.749                                     | 0.21 (1.15)            | 4.1               | 0.487                 |
| 320K              | upper | 51                    | 1.897                                     | 0.30 (1.36)            | 16.45             | 0.487                 |
| POPE              | lower | 1                     | 0.037                                     | 1.33 (0.00)            | 1.33              | 0.049                 |
| 308K              | upper | 1                     | 0.037                                     | 0.02 (0.00)            | 0.02              | 0.001                 |

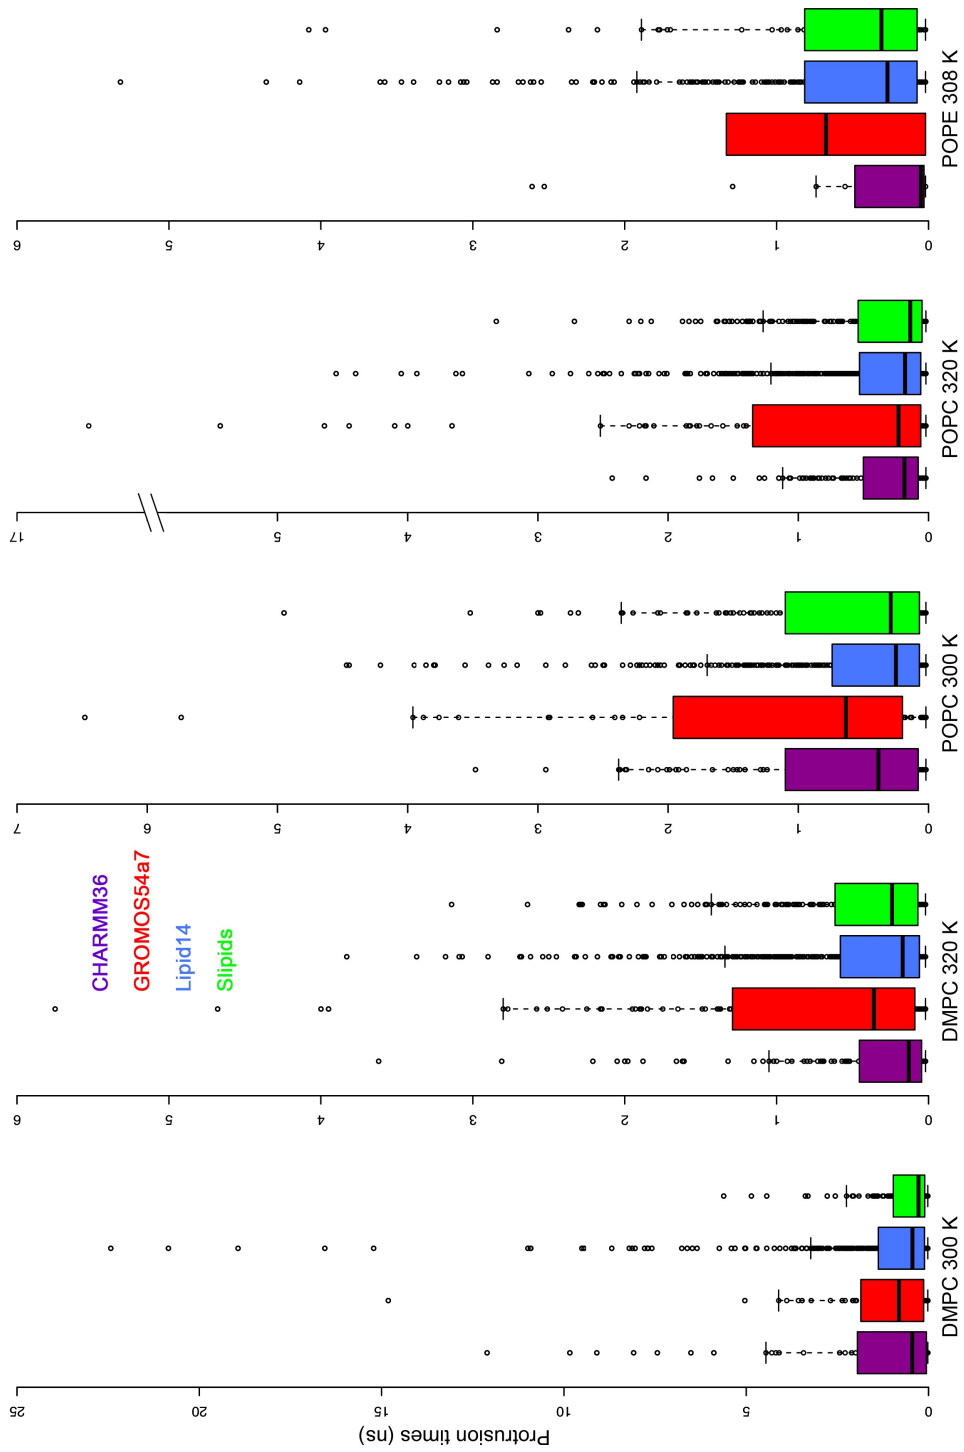

Figure S4: Box plots of lipid protrusion times for systems under study. CHARM36 is colored in purple, GROMOS54a7 in red, Lipid14 in blue, and Slipids in green. Horizontal top and bottom lines of each box define the first and third quartiles, the thick line inside the box is the median. The whiskers (horizontal lines outside the box) determine the last data point that is no more away than 1.5 times the interquartile range (box length) from the box. Box plots were generated with RStudio.<sup>8</sup>



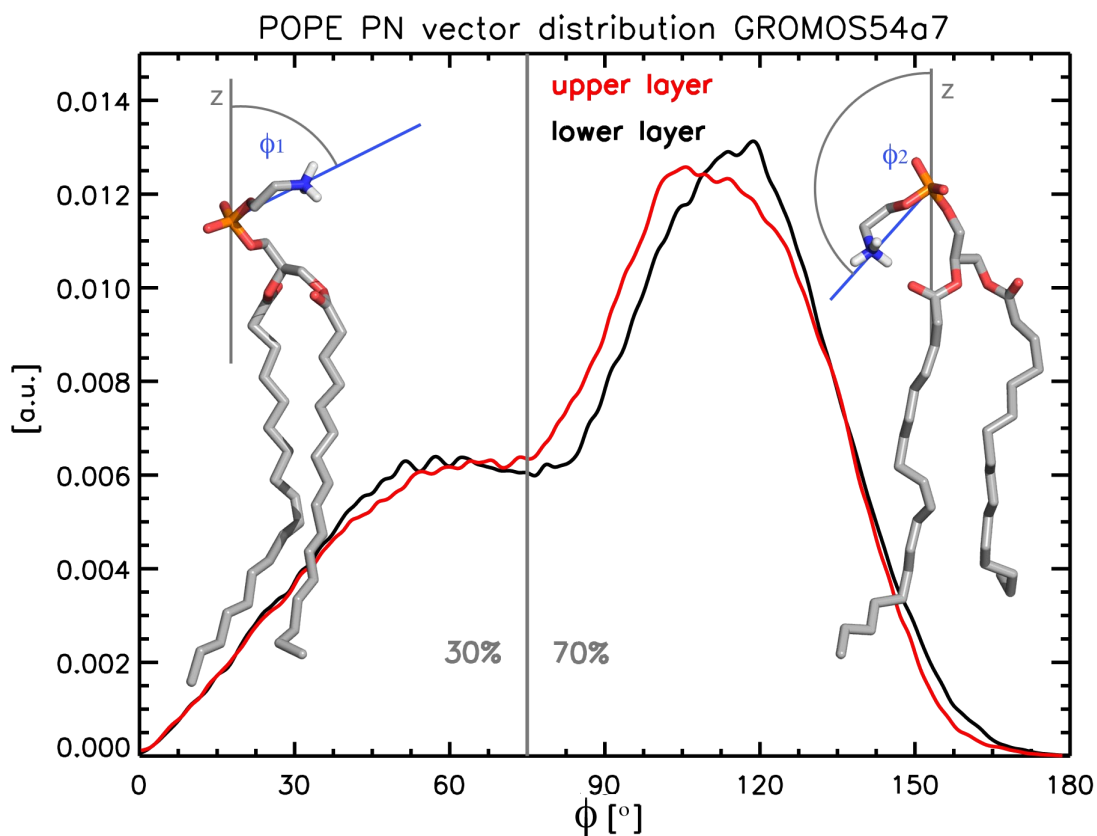

Figure S5: Distribution of PN vectors relative to the membrane normal for the POPE gel phase obtained by the GROMOS54a7 force field. The population of lipids with the PN vector smaller than  $75^\circ$  (an example lipid shown on the left) corresponds to 30%, the population of lipids with the PN vector larger than  $75^\circ$  (an example lipid shown on the right) makes up 70%.

# Calculation of order parameters of unsaturated carbons

Using the GROMACS's tool *g\_order* to calculate the order parameters around unsaturated carbons succeeds by following following workflow. The test case is a lipid containing one saturated chain (palmitoyl carbons named C2A - C2P) and one monounsaturated (oleoyl, carbons C1A-C1R) chain.

## Step 1. Calculation of standard saturated order parameters for all carbons.

First index files have to be created for each chain individually containing only carbons for which order parameters should be calculated. Please note, that using *g\_order* no order parameter value can be calculated for the first and the last carbon in the chain.

```
make_ndx -f backmapped.gro -o sn1.ndx << EOF
del 0-20
a C2A
a C2B
a C2C
a C2D
a C2E
a C2F
a C2G
a C2H
a C2I
a C2J
a C2K
a C2L
a C2M
a C2N
a C2O
a C2P
q
EOF
```

```
make_ndx -f backmapped.gro -o sn2.ndx << EOF
del 0-20
a C1A
a C1B
a C1C
a C1D
a C1E
a C1F
a C1G
a C1H
```

```

a C1I
a C1J
a C1K
a C1L
a C1M
a C1N
a C1O
a C1P
a C1Q
a C1R
q
EOF

```

Next *g\_order* is used to calculate the order parameters for each chain.

```
g_order -s topol.tpr -f traj.xtc -n sn1.ndx -d z -od deuter_sn1.xvg
```

```
g_order -s topol.tpr -f traj.xtc -n sn2.ndx -d z -od deuter_sn2.xvg
```

## Step 2. Calculation of order parameters for unsaturated carbons

The double bond is found between atoms C1I and C1J. Calculation of the order parameter for atom C1J ( - C1I = C1J - C1K - ) succeeds following

```

make_ndx -f backmapped.gro -o sn2-C1J.ndx << EOF
del 0-20
a C1I
a C1J
a C1K
q
EOF

```

```

g_order -unsat -f traj.xtc -s topol.tpr -n sn2-C1J.ndx -d z
-od deuter_C1J.xvg

```

The order parameter for atom C1I is calculated following the opposite direction ( - C1J = C1I - C1H - ).

```

make_ndx -f backmapped.gro -o sn2-C1I.ndx << EOF
del 0-20
a C1J
a C1I
a C1H
q
EOF

```

```
g_order -unsat -f traj.xtc -s topol.tpr -n sn2-C1I.ndx -d z
-od deuter_C1I.xvg
```

### Step 3. Combining results

In the last step the order parameters in the file `deuter_sn2.xvg` of atoms C1J and C1I are replaced by results obtained by calculation using the option `-unsat` and proper atom order.

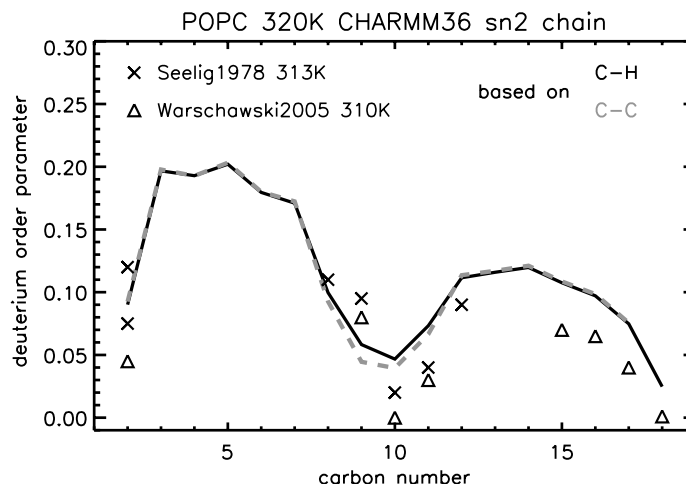

Figure S6: Deuterium order parameters of the unsaturated sn2 chain of POPC simulated by CHARMM36 at 320 K calculated based on C-H orientation (black) or C-C orientation (grey). The latter method is applied in GROMACS' tool `g_order`. The spread of the experimental data (crosses and triangles) is larger than the difference between the two theoretical methods.

## References

- (1) MacKerell, A. D.; Bashford, D.; Bellott, R. L.; Dunbrack, R. L.; Evanseck, J. D.; Field, M. J.; Fischer, S.; Gao, J.; Guo, H.; Ha, S. et al. All-atom empirical potential for molecular modeling and dynamics studies of proteins. *J. Phys. Chem. B* **1998**, *102*, 3586–3616.
- (2) Sun, Y.; Kollman, P. A. Hydrophobic solvation of methane and nonbond parameters of the TIP3P water model. *J. Comput. Chem.* **1995**, *16*, 1164–1169.
- (3) Berendsen, H. J. C.; Postma, J. P. M.; van Gunsteren, W. F.; Hermans, J. Interaction models for water in relation to protein hydration. *Intermolecular Forces* **1981**, 331–342.
- (4) Almeida, P. F.; Vaz, W. L.; Thompson, T. Lateral diffusion in the liquid phases of dimyristoylphosphatidylcholine/cholesterol lipid bilayers: a free volume analysis. *Biochemistry* **1992**, *31*, 6739–6747.

- (5) Filippov, A.; Orädd, G.; Lindblom, G. Influence of cholesterol and water content on phospholipid lateral diffusion in bilayers. *Langmuir* **2003**, *19*, 6397–6400.
- (6) Köchy, T.; Bayerl, T. M. Lateral diffusion coefficients of phospholipids in spherical bilayers on a solid support measured by  $^2\text{H}$ -nuclear-magnetic-resonance relaxation. *Phys. Rev. E* **1993**, *47*, 2109.
- (7) Jin, A. J.; Edidin, M.; Nossal, R.; Gershfeld, N. A singular state of membrane lipids at cell growth temperatures. *Biochemistry* **1999**, *38*, 13275–13278.
- (8) RStudio Team, RStudio: Integrated Development Environment for R. RStudio, Inc.: Boston, MA, 2015.
